# THE AMERICAN JOURNAL OF PSYCHIATRY

---

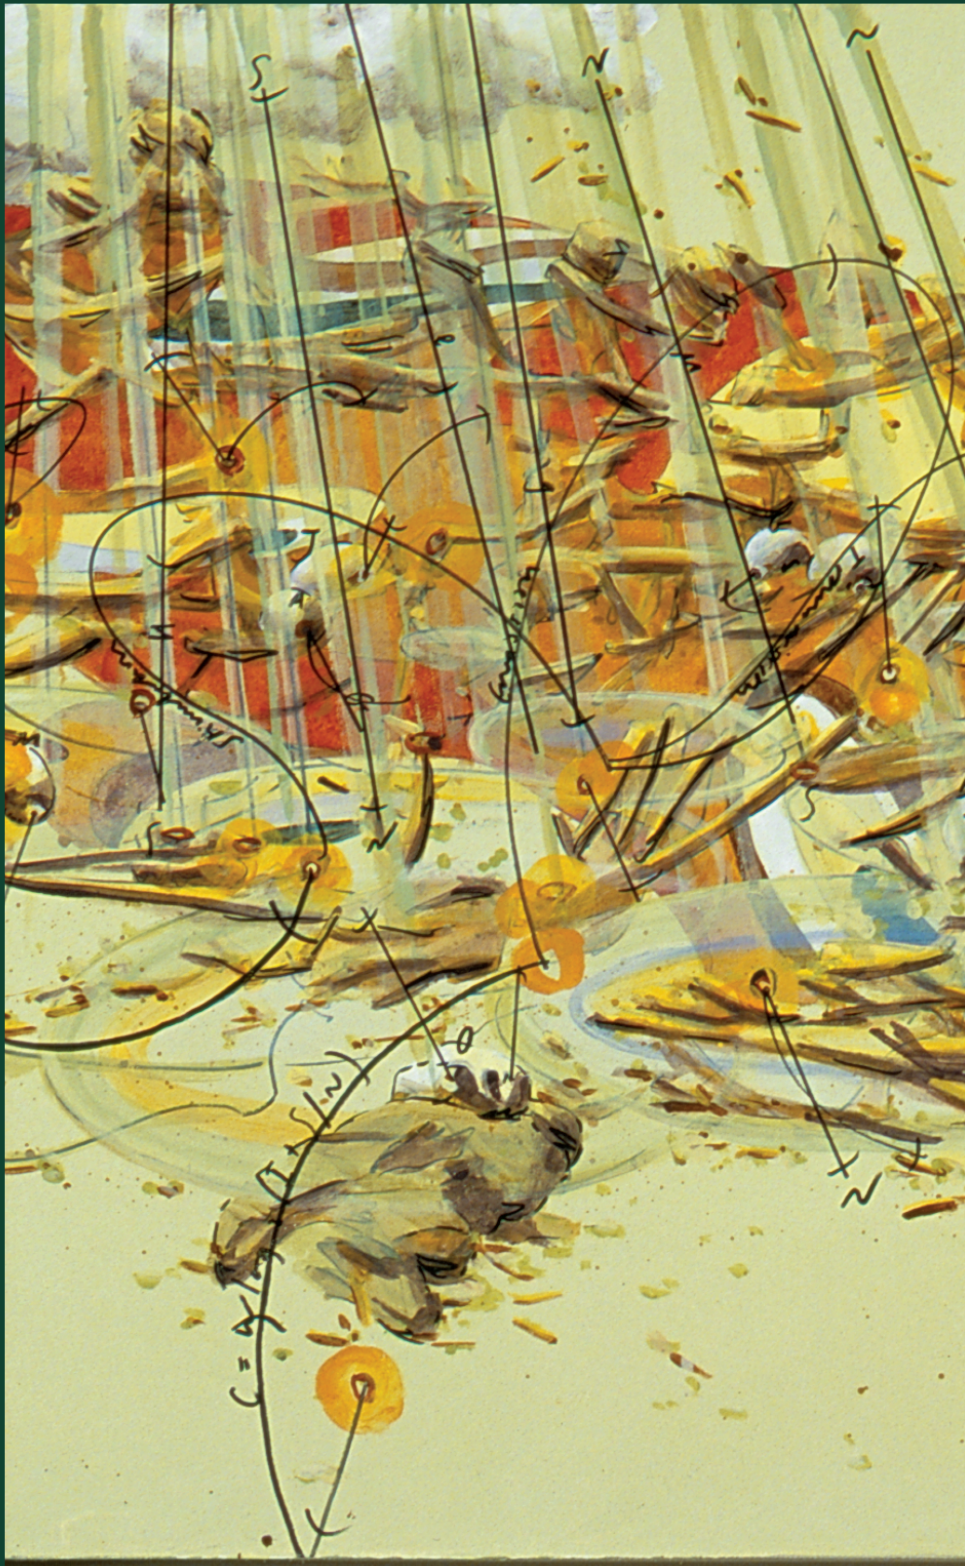

Efficacy of Functional  
Remediation in Bipolar Disorder  
Carla Torrent, Ph.D., et al. 852

Adapting Smoking Cessation  
Treatment According to  
Initial Response to Precessation  
Nicotine Patch  
Jed E. Rose, Ph.D., and  
Frédérique M. Behm, C.R.A. 860

White Matter Microstructure  
and Atypical Visual Orienting in  
7-Month-Olds at Risk for Autism  
Jed T. Elison, Ph.D., et al. 899

◀ High Loading of Polygenic Risk for  
ADHD in Children With Comorbid  
Aggression  
Marian L. Hamshere, Ph.D., et al. 909

**August 2013**

**Volume 170 • Number 8**

---

Official Journal of the  
AMERICAN PSYCHIATRIC ASSOCIATION

---

[ajp.psychiatryonline.org](http://ajp.psychiatryonline.org)
