# THE AMERICAN PSYCHIATRIC ASSOCIATION

1000 Wilson Blvd., Suite 1825, Arlington, VA 22209-3901  
(888) 357-7924 (toll-free inside the U.S. and Canada) / (703) 907-7300  
web site: [www.psychiatry.org](http://www.psychiatry.org) • e-mail: [apa@psych.org](mailto:apa@psych.org)

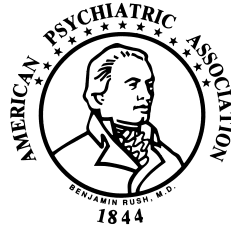

## OFFICERS 2013–2014

|                 |                            |
|-----------------|----------------------------|
| President       | Jeffrey A. Lieberman, M.D. |
| President-Elect | Paul Summergrad, M.D.      |
| Treasurer       | David Fassler, M.D.        |
| Secretary       | Maria A. Oquendo, M.D.     |

## ASSEMBLY

|               |                        |
|---------------|------------------------|
| Speaker       | Melinda L. Young, M.D. |
| Speaker-Elect | Jenny L. Boyer, M.D.   |
| Recorder      | Glenn A. Martin, M.D.  |

## MEDICAL DIRECTOR'S OFFICE

Medical Director and CEO James H. Scully, Jr., M.D.

## BOARD OF TRUSTEES

|                              |                         |                             |
|------------------------------|-------------------------|-----------------------------|
| Jeffrey Akaka, M.D.          | Jeffrey Geller, M.D.    | Phillip M. Murray, M.D.     |
| Christina J. Arredondo, M.D. | Marc David Graff, M.D.  | James E. Niningger, M.D.    |
| Carol A. Bernstein, M.D.     | James A. Greene, M.D.   | John M. Oldham, M.D.        |
| Lara J. Cox, M.D., M.S.      | Dilip V. Jeste, M.D.    | Uyen-Khanh Quang-Dang, M.D. |
| Brian Crowley, M.D.          | Judith F. Kashtan, M.D. | Gail E. Robinson, M.D.      |
| Anita S. Everett, M.D.       | Molly K. McVoy, M.D.    | Erik R. Vanderlip, M.D.     |

## PUBLISHER

Rebecca D. Rinehart

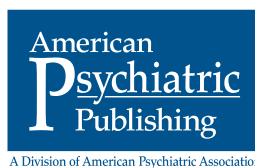

The American Journal of Psychiatry is online at [ajp.psychiatryonline.org](http://ajp.psychiatryonline.org)

THE AMERICAN PSYCHIATRIC ASSOCIATION  
Chairpersons of Councils, Commissions, Committees, and Task Forces

Standing Committees

**Bylaws**

Rebecca W. Brendel, M.D., J.D.

**Elections**

Barry K. Herman, M.D.

**Ethics**

Richard D. Milone, M.D.

**Finance and Budget**

Alan F. Schatzberg, M.D.

*Audit*

David Fassler, M.D.

*Investment Oversight*

Larry R. Faulkner, M.D.

**Joint Reference**

Paul Summergrad, M.D.

**Membership**

Jonathan M. Amiel, M.D.

**Nominating**

Dilip V. Jeste, M.D.

**Tellers**

Hind Benjelloun, M.D.

**Council on Addiction Psychiatry**

Frances R. Levin, M.D.

**Council on Advocacy and Government Relations**

Robert Paul Cabaj, M.D.

*Advocacy and Litigation Funding*

Renee L. Binder, M.D.

**Council on Children, Adolescents, and Their Families**

Louis J. Kraus, M.D.

*Agnes Purcell McGavin Award*

*Blanche F. Ittleson Research Award*

Matthew W. State, M.D.

**Council on Communications**

Jeffrey A. Borenstein, M.D.

**Council on Geriatric Psychiatry**

Robert P. Roca, M.D.

**Council on Healthcare Systems and Financing**

Howard H. Goldman, M.D.

*Reimbursement for Psychiatric Care*

Bruce J. Schwartz, M.D.

*RBRVS, Codes and Reimbursement*

Ronald M. Burd, M.D.

**Council on Medical Education and Lifelong Learning**

Richard F. Summers, M.D.

*APA Public Psychiatry Fellowship Selection Committee*

Christina V. Mangurian, M.D.

*APA/SAMHSA Minority Fellowship Selection and Advisory*

Altha J. Stewart, M.D.

*Scientific Program*

Philip R. Muskin, M.D.

*Scientific Program Committee of the Institute on Psychiatric Services*

Altha J. Stewart, M.D.

*Task Force to Update the Ethics Annotations*

Laura W. Roberts, M.D.

*Vestermark Award Committee*

Joel Yager, M.D.

**Council on Minority Health and Health Disparities**

Sandra C. Walker, M.D.

**Council on Psychiatry And Law**

Steven K. Hoge, M.D.

*Isaac Ray/Human Rights Award*

Steven K. Hoge, M.D.

*Judicial Action*

Paul S. Appelbaum, M.D.

*Manfred S. Guttmacher Award*

David A. Lowenthal, M.D.

**Council on Psychosomatic Medicine  
(Consultation Liaison Psychiatry)**

Joel E. Dimsdale, M.D.

**Council on Quality Care**

Joel Yager, M.D.

*Electronic Health Records*

Steven Roy Daviss, M.D.

*Steering Committee on Practice Guidelines*

Michael J. Vergare, M.D.

**Council on Research**

Dwight L. Evans, M.D.

*Psychiatric Dimensions of Disasters*

Charles R. Marmar, M.D.

*Research Awards*

Timothy B. Walsh, M.D.

*Task Force to Revise the Practice of Electroconvulsive Therapy*

Sarah H. Lisanby, M.D.

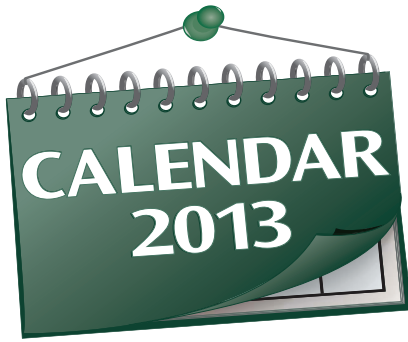

For free listing of your organization's official annual or regional meeting, please send us the following information: sponsor, location, inclusive dates, type and number of continuing education credits (if available), and the name, address, and telephone number of the person or group to contact for more information. In order for an event to appear in our listing, all notices and changes must be received at least 6 months in advance of the meeting and should be addressed to:

*Calendar, American Journal of Psychiatry, 1000 Wilson Boulevard, Suite 1825, Arlington, VA 22209-3901, [swestate@psych.org](mailto:swestate@psych.org) (e-mail).*

*Because of space limitations, only listings of meetings of the greatest interest to Journal readers may be included.*

---

## SEPTEMBER

**September 19–22**, North Carolina Psychiatric Association conference "Side Effects: Adherence, Tolerability and Insight in Psychiatric Treatment," Asheville, N.C. Contact: 919-859-3370 (tel); [info@ncpsychiatry.org](mailto:info@ncpsychiatry.org) (email); [www.ncpsychiatry.org/annual-meeting-scientific-session](http://www.ncpsychiatry.org/annual-meeting-scientific-session) (web site).

**September 25–27**, 9th Congress of the International Neuropsychiatric Association, Chicago, Ill. [www.inawebsite.org](http://www.inawebsite.org) (web site).

---

## OCTOBER

**October 10–13**, 65th Institute on Psychiatric Services, Philadelphia, Pa. Contact: APA Annual Meetings Dept., 1000 Wilson Blvd, Suite 1825, Arlington, VA 22209; <http://www.psychiatry.org/learn/institute-on-psychiatric-services> (web site).

[www.psychiatry.org/learn/institute-on-psychiatric-services](http://www.psychiatry.org/learn/institute-on-psychiatric-services) (web site).

**October 16–19**, annual meeting of the Association for Academic Psychiatry, Charleston, S.C. [www.academicpsychiatry.org](http://www.academicpsychiatry.org) (web site).

**October 17–21**, XXI World Congress of Psychiatric Genetics, Boston, Mass. Contact congress organizer: Parthenon Management Group, 5034A Thoroughbred Lane, Brentwood, TN 37027; (615) 324-2365 (tel); [info@parthenonmanagementgroup.com](mailto:info@parthenonmanagementgroup.com) (email); [www.wcpg2013.org](http://www.wcpg2013.org) (web site).

---

## FEBRUARY 2014

**February 16–20**, 25th Annual Meeting of the American Neuropsychiatric Association, Seattle, Wash. [www.anpaonline.org](http://www.anpaonline.org) (web site).

---

## MARCH 2014

**March 12–15**, 43rd Annual Meeting of the American Association of Directors of Psychiatric Residency Training, Tucson, Ariz. [www.aadprt.org](http://www.aadprt.org) (web site).

---

## MAY 2014

**May 3–7**, 167th Annual Meeting, American Psychiatric Association, New York, NY. Contact: APA Annual Meetings Dept., 1000 Wilson Blvd, Suite 1825, Arlington, VA 22209; (703) 907-7815 (tel); <http://www.psych.org/learn/annual-meeting> (web site).

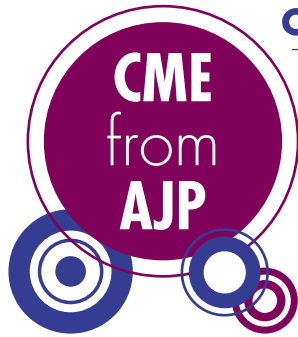

## Continuing Medical Education

Three articles in this issue form the basis of a short course with questions that can be answered for up to 1 *AMA PRA Category 1 Credit*<sup>™</sup> each by visiting <http://psychiatryonline.org/cme.aspx> and clicking on the “American Journal of Psychiatry” tab.

CME credit is issued only online, and a paid subscription to the AJP CME course program is required.

This month’s courses appear on pages 935–938.

FREE AUDIO!

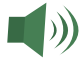

## Have You Heard?

You can listen to highlights of *The American Journal of Psychiatry* by downloading a monthly free .mp3 audio file from our web site (<http://ajp.psychiatryonline.org/audio.aspx#>) or by subscribing to the AJP Audio podcast at iTunes or other feed reader. Presented by Deputy Editor Dr. Susan Schultz or by Executive Editor Michael Roy, each month’s audio lasts approximately 30 minutes and covers several research articles, the Treatment in Psychiatry feature, and one or two editorials.

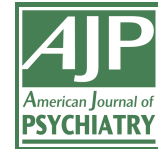

Coming in the September 2013 issue\*

## THE AMERICAN JOURNAL OF PSYCHIATRY

### Gang Membership, Violence, and Psychiatric Morbidity

J.W. Coid, S. Ullrich, R. Keers, P. Bebbington, B.L. DeStavola, C. Kallis, M. Yang,  
D. Reiss, R. Jenkins, and P. Donnelly

### Metformin for Weight Loss and Metabolic Control in Overweight Outpatients With Schizophrenia and Schizoaffective Disorder

L.F. Jarskog, R.M. Hamer, D.J. Catellier, D.D. Stewart, L. LaVange, N. Ray, L.H. Golden,  
J.A. Lieberman, and T.S. Stroup, for the METS Investigators

### A Trial of Prazosin for Combat Trauma PTSD With Nightmares in Active-Duty Soldiers Returned From Iraq and Afghanistan

M.A. Raskind, K. Peterson, T. Williams, D.J. Hoff, K. Hart, H. Holmes, D. Homas, J. Hill,  
C. Daniels, J. Calohan, S.P. Millard, K. Rohde, J. O’Connell, D. Pritzl, K. Feiszli, E.C. Petrie, C. Gross,  
C.L. Mayer, M.C. Freed, C. Engel, E.R. Peskind

### Determination of Genotype Combinations That Can Predict the Outcome of the Treatment of Alcohol Dependence Using the 5-HT<sub>3</sub> Antagonist Ondansetron

B.A. Johnson, C. Seneviratne, X.-Q. Wang, N. Ait-Daoud, and M.D. Li

\*Can’t wait? Visit [ajp.psychiatryonline.org/AJPIAdvance.aspx](http://ajp.psychiatryonline.org/AJPIAdvance.aspx) to see all articles uploaded in advance of print!

# The Residents' JOURNAL

## The Residents' JOURNAL

a publication of  
The American Journal of Psychiatry

June 2013

Volume 8

Issue 6

### Inside

- 2 **Advancing to the Next Phase**  
Monifa Seawell, M.D.
- 3 **Duties to Warn and Protect in Current Psychiatric Practice**  
Jacob M. Appel, M.D., J.D.
- 5 **Psychopathy in Women: A Clinical and Diagnostic Update**  
Alexis Mermigas, M.D.  
Jacqueline Landess, M.D.
- 7 **Incorporating ACGME Core Competencies in Educational Curricula**  
Deepak Prabhakar, M.D., M.P.H.
- 8 **Traditional and Herbal Medications in the Treatment of Alzheimer's Disease**  
John C. Wilson, M.D., Ph.D.
- 11 **Mental Illness and Stigma: How Far Have We Come?**  
Parnika P. Saxena, M.D.
- 12 **A Different Theory of Relativity: Jungian Synchronicity**  
Shannon L. Delaney, M.D.
- 14 **Author Information**
- 14 **Upcoming Themes**

### In This Issue

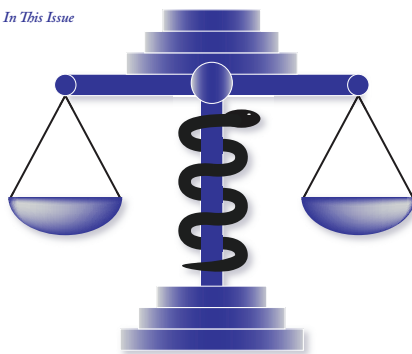

This issue of the *Residents' Journal* features a section theme on forensic psychiatry. Jacob Appel, M.D., J.D., provides enlightening information on the duty to warn and protect in current psychiatric practice. Alexis Mermigas, M.D., and Jacqueline Landess, M.D., discuss the poorly understood concept of psychopathy in women, including clinical manifestations and comorbidities.

Editor-in-Chief  
Monifa Seawell, M.D.

Senior Editor  
Sarah M. Fayad, M.D.

Associate Editor  
Arshya Vahabzadeh, M.D.

Guest Section Editor  
Megan Testa, M.D.

Editors Emeriti  
Sarah B. Johnson, M.D.  
Molly McVoy, M.D.  
Joseph M. Cerimele, M.D.

Staff Editor  
Angela Moore

*The Residents' Journal* accepts manuscripts authored by medical students, resident physicians, and fellows. To submit your paper, please visit the manuscript submission site at [mc.manuscriptcentral.com/appi-ajp](http://mc.manuscriptcentral.com/appi-ajp) and either create an account or use your existing account. For manuscript type, select "Residents." Then follow the instructions to upload your manuscript. Residents who are interested in participating as Guest Section Editors should e-mail *The Residents' Journal* Editor-in-Chief Monifa Seawell at [mseawell@med.wayne.edu](mailto:mseawell@med.wayne.edu).

*The Residents' Journal* is sent free-of-charge to all psychiatry residents. Anyone interested in being included on the distribution list should contact Angela Moore, *The Residents' Journal* staff editor at [ajp@psych.org](mailto:ajp@psych.org) with "Subscribe to Residents' Journal" in the subject line.

To access the complete Residents' Journal archives, visit [ajp.psychiatryonline.org/residents\\_journal.aspx](http://ajp.psychiatryonline.org/residents_journal.aspx)

# THE AMERICAN JOURNAL OF PSYCHIATRY

## The most widely read psychiatric journal in the world!

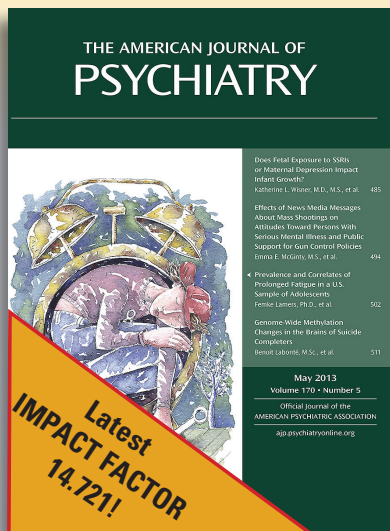

- *The American Journal of Psychiatry* (AJP) latest Impact Factor is 14.721, a nearly 2 point rise from last year's 12.759 according to the recently released 2012 Journal Citation Reports® (Thomson Reuters, 2013). AJP, a publication of the American Psychiatric Association, ranks second among 135 journals in psychiatry.
  - *The American Journal of Psychiatry* is again among the top journals in psychiatry in terms of immediacy according to Thomson Scientific's Immediacy Index. This important performance metric is a good measure of how quickly a given journal's articles are cited—AJP's placement is a result of publishing articles that are relevant, covering current “hot” topics and cutting-edge research, and getting these findings to the field faster with AJP in Advance, the Journal's online-ahead-of-print publication protocol.
  - And, as it has for many years, AJP remains far and away the leader among psychiatric publications in total citations. It's 42,730 citation count was almost 5,000 citations above the next publication.
- The editors of *Journal Watch Psychiatry* announced the top psychiatry stories of 2012. Four articles from *The American Journal of Psychiatry* were honored:
    - Metformin for Antipsychotic-Induced Adverse Effects in Women With Schizophrenia (Am J Psychiatry 2012;169:813-821.)
    - Creatine Augmentation of SSRIs for Depression (Am J Psychiatry 2012;169:937-945)
    - Antipsychotics Vary in Mortality Risk in Dementia Patients (Am J Psychiatry 2012;169:71-79.)
    - Tools for Preventing Postpartum Psychosis and Mania (Am J Psychiatry 2012;169:609-615)

### No other journal had more than one article in the top stories.

- A poll conducted by the BioMedical & Life Sciences Division of The Special Libraries Association identified the 100 most influential journals in all of Biology & Medicine over the last 100 years. *The American Journal of Psychiatry* was among those honored, the only psychiatry/psychology journal represented.

ISSN 0002-953X • [ajp.psychiatryonline.org](http://ajp.psychiatryonline.org)

For subscription information email [institutions@psych.org](mailto:institutions@psych.org), or call 703-907-8538

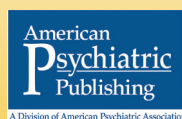

The *First* and *Last* Word in Psychiatry

[www.appi.org](http://www.appi.org) • 1-800-368-5777 • 703-907-7322

AH1303R

## Contents

- A1 Editorial Board  
A3 Highlights of this issue

## Editorials

- 1 **ICD-11 should not repeat the mistakes made by DSM-5**  
A. J. Frances and J. M. Nardo
- 3 **Mixed features of depression: why DSM-5 is wrong (and so was DSM-IV)**  
A. Koukopoulos, G. Sani and S. N. Ghaemi
- 5 **Eleanora Fleury captured – extra**  
Aidan Collins
- 6 **Tardive dyskinesia in schizophrenia**  
P. F. Liddle
- 8 **Lack of interventions for anxiety in older people**  
R. C. Oude Voshaar

## Review article

- 10 **Socioeconomic status as a risk factor for dementia death: individual participant meta-analysis of 86 508 men and women from the UK**  
T. C. Russ, E. Stamatakis, M. Hamer, J. M. Starr, M. Kimimäki and G. D. Batty
- 17 **Endless Night – poems by doctors**  
Shaun Love

## Papers

- 18 **Cardiovascular and metabolic risk profile in young people at familial risk of depression**  
Z. N. Mannie, C. Williams, J. Diesch, A. Steptoe, P. Leeson and P. J. Cowen
- 23 **Serotonin – in 100 words**  
Philip J. Cowen
- 24 **Adult attention-deficit hyperactivity disorder and obesity: epidemiological study**  
S. Cortese, S. V. Faraone, S. Bernardi, S. Wang and C. Blanco
- 34 **Reflections on Beckett's *Murphy* – psychiatry in literature**  
Larkin Feeney, Peter McCarron
- 35 **Cognitive dysfunctions in recreational and dependent cocaine users: role of attention-deficit hyperactivity disorder, craving and early age at onset**  
M. Vonmoos, L. M. Hulka, K. H. Preller, D. Jenni, M. R. Baumgartner, R. Stohler, K. I. Bolla and B. B. Quednow
- 44 **Characteristics and rates of mental health problems among Indian and White adolescents in two English cities**  
N. Dogra, N. Sviryzdenka, P. Dugard, S. P. Singh and P. Vostanis

- 51 **Structural brain changes associated with tardive dyskinesia in schizophrenia**  
S. Sarró, E. Pomarol-Clotet, E. J. Canales-Rodríguez, R. Salvador, J. J. Gomar, J. Ortiz-Gil, R. Landín-Romero, F. Vila-Rodríguez, J. Blanch and P. J. McKenna
- 58 **Reducing duration of untreated psychosis: care pathways to early intervention in psychosis services**  
M. Birchwood, C. Connor, H. Lester, P. Patterson, N. Freemantle, M. Marshall, D. Fowler, S. Lewis, P. Jones, T. Amos, L. Everard and S. P. Singh
- 65 **Age differences in treatment response to a collaborative care intervention for anxiety disorders**  
J. L. Wetherell, A. J. Petkus, S. R. Thorp, M. B. Stein, D. A. Chavira, L. Campbell-Sills, M. G. Craske, C. Sherbourne, A. Bystritsky, G. Sullivan and P. Roy-Byrne

## Short report

- 73 **Messages from Manchester: pilot randomised controlled trial following self-harm**  
N. Kapur, D. Gunnell, K. Hawton, S. Nadeem, S. Khalil, D. Longson, R. Jordan, I. Donaldson, R. Emsley and J. Cooper

## Columns

- 75 Correspondence  
75 Correction  
76 Book reviews  
78 Contents of *Advances in Psychiatric Treatment*  
79 Contents of the *American Journal of Psychiatry*  
80 From the Editor's desk

## Cover picture

Stills from *All Divided Selves* (2011). Luke Fowler (b. 1978)

Known for his portraits of radical figures and social experiments, Glaswegian artist Luke Fowler was one of the nominees for the Turner Prize 2012 for his film *All Divided Selves* about RD Laing. Based on original archive footage, interleaved with Fowler's own film and sound, the piece is a collage of material from different stages of Laing's life and work. The editing of footage from a variety of contexts results in a narrative discontinuity that merges public appearances and television interviews together with moments of everyday clinical work. Previous examples of Fowler's biographical and documentary filmmaking have often focused on psychiatry or anti-psychiatry. *What You See Is Where You're At* (2001) described Kingsley Hall, a community centre in east London, founded in the 1960s by RD Laing and the Philadelphia Association as an alternative to conventional mental institutions. In a subsequent installation, *The Nine Monads of David Bell* (2006), the artist focused on David Bell, one of the residents at Kingsley Hall, with an installation that included a sound piece from original recordings of David Bell's speech, notes he wrote on newspaper and video reenactments of his dreams.

Images courtesy the artist, The Modern Institute/Toby Webster Ltd, Glasgow and Galerie Gisela Capitain, Cologne. Submitted by Dr Isabel Valli.

We are always looking for interesting and visually appealing images for the cover of the *Journal* and would welcome suggestions or pictures, which should be sent to Dr Allan Beveridge, British Journal of Psychiatry, 17 Belgrave Square, London SW1X 8PG, UK or [bjp@rcpsych.ac.uk](mailto:bjp@rcpsych.ac.uk).

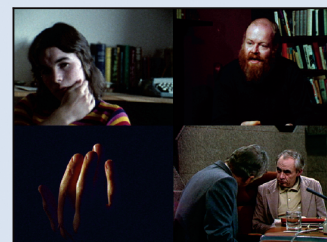

## IN THIS ISSUE

doi: 10.3969/j.issn.1002-0829.2013.03.001

## REVIEW

**Use of antipsychotics in the treatment of depressive disorders**

doi: 10.3969/j.issn.1002-0829.2013.03.002

## ORIGINAL ARTICLES

**Case-control study of error-related negativity among males with heroin dependence undergoing rehabilitation**

doi: 10.3969/j.issn.1002-0829.2013.03.003

**Effect of combined treatment with clozapine and metformin on fasting blood glucose, insulin level, and expression of the glucose transporter-2 (GLUT<sub>2</sub>) in Sprague-Dawley rats**

doi: 10.3969/j.issn.1002-0829.2013.03.004

**Binocular rivalry in children with schizophrenia: the conscious and unconscious cognitive processing of interpersonal information**

doi: 10.3969/j.issn.1002-0829.2013.03.005

**Anxiety, depression, and associated factors among inpatients waiting for heart transplantation**

doi: 10.3969/j.issn.1002-0829.2013.03.006

## COMMENTARY

**Changing the focus of suicide research in china from to urban communities**

doi: 10.3969/j.issn.1002-0829.2013.03.007

**Prevalence of autism spectrum disorders in China**

doi: 10.3969/j.issn.1002-0829.2013.03.008

## CASE REPORT

**Two cases of neuroleptic malignant syndrome in elderly patients taking atypical antipsychotics**

doi: 10.3969/j.issn.1002-0829.2013.03.009

## BIostatistics in Psychiatry (15)

**Survival analysis for observational and clustered data: an application for assessing individual and environmental risk factors for suicide**

doi: 10.3969/j.issn.1002-0829.2013.03.010

## CORRESPONDENCE

**Antidepressants for children with depression**

doi: 10.3969/j.issn.1002-0829.2013.03.011
