# THE AMERICAN JOURNAL OF PSYCHIATRY

## En este número

A16

### Perspectivas

#### Editoriales

- 815** **La cara inadvertida del trastorno bipolar**  
Robert M.A. Hirschfeld
- 818** **En busca de un tratamiento más efectivo de cesación del tabaquismo**  
Robert Freedman **Audio**
- 821** **Reconsideración de la esquizofrenia como una enfermedad relacionada con el antígeno leucocitario humano**  
Peter McGuffin y Robert A. Power
- 824** **Trastornos alimenticios y riesgo de muerte**  
Scott Crow

#### Introspección

- 826** **Pakistán**  
Anita Aijaz

#### Tratamiento en Psiquiatría

- 828** **Un adolescente con autolesiones no suicidas: Caso y discusión de la investigación neurobiológica sobre la regulación de las emociones**  
Kathryn R. Cullen, Melinda K. Westlund, Lori L. LaRivière, y Bonnie Klimes-Dougan **Audio** **Guías clínicas**

#### Imágenes en Psiquiatría

- 832** **Artemesia Gentileschi, 1593–1653**  
Peter J. Buckley

#### Resúmenes y Reseñas

- 834** **Criterios del DSM-5 para los trastornos de abuso de sustancias: Recomendaciones y razonamiento**  
Deborah S. Hasin, Charles P. O'Brien, Marc Auriacombe, Guilherme Borges, Kathleen Bucholz, Alan Budney, Wilson M. Compton, Thomas Crowley, Walter Ling, Nancy M. Petry, Marc Schuckit, y Bridget F. Grant **Audio** **Guías clínicas**

### Nuevas Investigaciones

#### Artículos

- 852** **Eficacia de la remediación funcional en el trastorno bipolar: Un estudio multicéntrico, aleatorizado y controlado**  
Carla Torrent, Caterina del Mar Bonnin, Anabel Martínez-Arán, Jesús Valle, Benedikt L. Amann, Ana

González-Pinto, José Manuel Crespo, Àngela Ibáñez, Mari Paz Garcia-Portilla, Rafael Tabarés-Seisdedos, Celso Arango, Francesc Colom, Brisa Solé, Isabella Pacchiarotti, Adriane R. Rosa, Jose Luis Ayuso-Mateos, Celia Anaya, Patricia Fernández, Ramon Landín-Romero, Sílvia Alonso-Lana, Jordi Ortiz-Gil, Bàrbara Segura, Sara Barbeito, Patricia Vega, Miryam Fernández, Amaia Ugarte, Marta Subirà, Ester Cerrillo, Núria Custal, José Manuel Menchón, Jerónimo Saiz-Ruiz, Jose Maria Rodao, Sandra Isella, Analucía Alegría, Susana Al-Halabi, Julio Bobes, Gonzalo Galván, Pilar A. Saiz, Vicent Balanzá-Martínez, Gabriel Selva, Inmaculada Fuentes-Durá, Patricia Correa, María Mayoral, Guadalupe Chiclana, Jessica Merchan-Naranjo, Marta Rapado-Castro, Manel Salamero, y Eduard Vieta **Audio** **Guías clínicas** **Editorial**

- 860** **Adaptación del tratamiento de cesación del tabaquismo de acuerdo a la respuesta inicial al parche de nicotina antes de la intervención**

Jed E. Rose y Frédérique M. Behm **Audio** **Guías clínicas** **EMC** **Editorial**

- 868** **Asociación de la variación genética GSK-3 $\beta$  con expresión, grosor cortical prefrontal, fisiología prefrontal y esquizofrenia**

Giuseppe Blasi, Francesco Napolitano, Gianluca Ursini, Annabella Di Giorgio, Grazia Caforio, Paolo Taurisano, Leonardo Fazio, Barbara Gelao, Maria Teresa Attrotto, Lucia Colagiorgio, Giovanna Todarello, Francesco Piva, Apostolos Papazacharias, Rita Masellis, Marina Mancini, Annamaria Porcelli, Raffaella Romano, Antonio Rampino, Tiziana Quarto, Matteo Giulietti, Barbara K. Lipska, Joel E. Kleinman, Teresa Popolizio, Daniel R. Weinberger, Alessandro Usiello, y Alessandro Bertolino

- 877** **El papel de la región del complejo mayor de histocompatibilidad en la cognición y en la estructura cerebral: Estudio de seguimiento GWAD (estudio de asociación genómica amplia en esquizofrenia)**

James T.R. Walters, Dan Rujescu, Barbara Franke, Ina Giegling, Alejandro Arias-Vásquez, April Hargreaves, Giancarlo Russo, Derek W. Morris, Martine Hoogman, Andrea Da Costa, Valentina Moskvina, Guillén Fernández, Michael Gill, Aiden Corvin, Michael C. O'Donovan, Gary Donohoe, y Michael J. Owen **Editorial**

- 886** **Imágenes de endofenotipos de materia blanca obtenidas con tensor de difusión en pacientes con esquizofrenia o trastorno bipolar psicótico y en sus familiares**

Pawel Skudlarski, David J. Schretlen, Gunvant K. Thaker, Michael C. Stevens, Matcheri S. Keshavan, John A. Sweeney, Carol A. Tamminga, Brett A. Clementz, Kasey O'Neil, y Godfrey D. Pearlson

- 899 Microestructura de la materia blanca y orientación atípica visual en bebés de 7 meses con riesgo de autismo**  
Jed T. Elison, Sarah J. Paterson, Jason J. Wolff, J. Steven Reznick, Noah J. Sasson, Hongbin Gu, Kelly N. Botteron, Stephen R. Dager, Annette M. Estes, Alan C. Evans, Guido Gerig, Heather C. Hazlett, Robert T. Schultz, Martin Styner, Lonnie Zwaigenbaum, y Joseph Piven **Audio EMC**
- 909 Alta carga de riesgo poligénico de TDAH en niños con agresión comórbida**  
Marian L. Hamshere, Kate Langley, Joanna Martin, Sharifah Shameem Agha, Evangelia Stergiakouli, Richard J.L. Anney, Jan Buitelaar, Stephen V. Faraone, Klaus-Peter Lesch, Benjamin M. Neale, Barbara Franke, Edmund Sonuga-Barke, Philip Asherson, Andrew Merwood, Jonna Kuntsi, Sarah E. Medland, Stephan Ripke, Hans-Christoph Steinhausen, Christine Freitag, Andreas Reif, Tobias J. Renner, Marcel Romanos, Jasmin Romanos, Andreas Warnke, Jobst Meyer, Haukur Palmason, Alejandro Arias-Vasquez, Nanda Lambregts-Rommelse, Herbert Roeyers, Joseph Biederman, Alysia E. Doyle, Hakon Hakonarson, Aribert Rothenberger, Tobias Banaschewski, Robert D. Oades, James J. McGough, Lindsey Kent, Nigel Williams, Michael J. Owen, Peter Holmans, Michael C. O'Donovan, y Anita Thapar
- 917 Una investigación longitudinal de la mortalidad en anorexia nerviosa y bulimia nerviosa**  
Debra L. Franko, Aparna Keshaviah, Kamryn T. Eddy, Meera Krishna, Martha C. Davis, Pamela K. Keel, y David B. Herzog **Audio EMC Editorial**

## Comunicados y Actualizaciones

### Cartas al Editor

- 926** Atención colaborativa basada en la práctica vs. atención colaborativa basada en la telemedicina para la depresión  
Trastorno bipolar, esquizofrenia y síndrome metabólico  
Depresión preparto: Tratamiento con terapia cognitiva conductual asistida por computador  
Síntomas inducidos por la clozapina en el trastorno bipolar

## Reseñas Bibliográficas

- 931** The Placebo Effect in Clinical Practice [El efecto placebo en la práctica clínica]  
The Pathological Family: Postwar America and the Rise of Family Therapy [La familia patológica: Los Estados Unidos de la postguerra y el auge de la terapia familiar]  
Elements of Culture and Mental Health: Critical Questions for Clinicians [Aspectos de la cultura y de la salud mental: Cuestiones críticas para los clínicos]  
Care of Children Exposed to the Traumatic Effects of Disaster [Atención de niños expuestos a los efectos traumáticos de las catástrofes]

## Otros Temas de Interés

- 935** Educación Médica Continuada  
**A6** Directivos de la American Psychiatric Association  
**A9** Calendario  
**A14** Contenidos del *British Journal of Psychiatry*  
**A15** Contenidos del *Shanghai Archives of Psychiatry*

## Cubierta

"The Day" by Matthew Ritchie, 2003; acrylic and marker on canvas, 24 x 22 inches courtesy of Andrea Rosen Gallery, New York. Copyright © Matthew Ritchie.

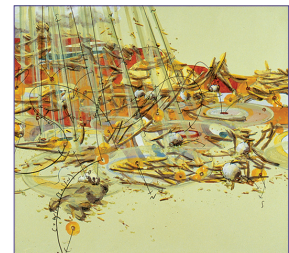

### Audio

artículo en AJP Audio: archivo .mp3 descargable de [ajp.psychiatryonline.org](http://ajp.psychiatryonline.org)

### Guías clínicas

este artículo ofrece guías clínicas (ver página "En este Número" o al final del artículo)

### EMC

existe un curso en línea que cubre los contenidos de este artículo para los suscriptores del programa de cursos de EMC del AJP

### Editorial

este artículo se discute en uno de los editoriales de este número

This issue's Spanish Table of Contents is presented in collaboration with the Office of Global Health, UMDNJ-Robert Wood Johnson Medical School

Translation courtesy of

Sergi Casals, M.S.

Garuna Editors ([www.garunaeditors.com](http://www.garunaeditors.com))  
Barcelona, Spain

Carlos Lopez Jaramillo, M.D.

Universidad de Antioquia,  
Medellin, Colombia

Javier I. Escobar, M.D., M.Sc.

UMDNJ-Robert Wood Johnson Medical School
